# Supplementary material for: Discveory of SERCA1 specific small molecule inhibotirs based on the survival mechanisms of metastatic hepatocellular carcinoma cells dependent on CaMK2α-Mediated SERCA1 expression
Source: Research Square preprint supplement (doi:10.21203/rs.3.rs-7382767/v1), 2025-09-17

**Supplementary Methods**

**Patient characteristics**

**Ethical considerations and study design**

The patients recruited for this study underwent liver resection. The patients were treated between from January 2018 to December 2022 at the Severance Hospital (Seoul, South Korea). The details of the patients’ presentations, surgical and pathological findings, and outcomes were obtained from the database of Cancer Center Database. All procedures involving patients were performed in accordance with the institutional ethical standards, applicable local/national regulations, and guidelines of the 1964 Helsinki Declaration and its later amendments. Formal in accordance with the Bioethics and Safety Act of Korea, formal written consent was not required for this retrospective observational analysis, in accordance with the Bioethics and Safety Act of Korea. The study protocol was approved by the Institutional Review Board (IRB) of Severance Hospital, Yonsei University College of Medicine (IRB protocol: 3-2022-0331). Cell samples were obtained from the patients at the Severance Hospital, Yonsei University College of Medicine, Seoul, Korea.

**Patient 1**YUMC-NM-H1 is a 71-year-old woman diagnosed with hepatocellular carcinoma (HCC). She presented with a 2.5 cm multinodular-confluent HCC located in segment 3 of the liver. She underwent a left lateral sectionectomy. The postoperative pathology confirmed HCC with clear resection margins. During routine follow-up examinations, including radiological studies and serum tumor markers (alpha-fetoprotein), no evidence of recurrence was observed.

**Patient 2**YUMC-M-H1 is a 53-year-old woman diagnosed with hepatocellular carcinoma (HCC). She had a 9 cm multinodular, confluent HCC involving the left liver lobe and the hilar bile duct. She underwent left trisectionectomy and radical resection of the common bile duct in October 2018. During subsequent follow-up, recurrence was detected in the omentum and lung. She was treated with sorafenib; however, tumor progression was also noted in the lungs. The chemotherapy regimen was subsequently switched to regorafenib. In June 2019, recurrence was limited to the omentum, with lung metastasis remaining stable. She subsequently underwent excision of an abdominal wall mass in June 2019.

**Patient 3**YUMC-M-H2 is a 67-year-old man diagnosed with hepatocellular carcinoma (HCC). He presented with a 2 cm tumor in the right lobe of the liver and underwent right hemihepatectomy in February 2018. Twelve months postoperatively, metastasis to the right diaphragm was identified during routine follow-up. In April 2019, he underwent wide excision of the diaphragmatic mass. Following this, he received sorafenib chemotherapy for 11 months. In February 2020, further recurrence was noted in the diaphragm and omentum. He then underwent wide excision of the diaphragm and omentectomy.. Postoperatively, he received a third line of chemotherapy with 5-FU and cisplatin between March 2020 and August 2021. Due to multiple subsequent recurrences involving segment 4 of the liver, the mesentery around the transverse colon, and the retroperitoneum near the right adrenal gland, chemotherapy was discontinued. In March 2022, he underwent wedge resection of segment 4 of the liver, segmental resection of the colon, and retroperitoneal resection. Culture specimens obtained during this procedure confirmed the histopathological diagnosis of HCC. The patient subsequently ceased hospital visits and follow-up was discontinued.

**Patient 4**YUMC-M-H3 is a 71-year-old man diagnosed with hepatocellular carcinoma (HCC). He presented 2 cm tumor in the right lobe of the liver and underwent right anterior sectionectomy in February 2019. three months postoperatively, metastasis to the lymph node was identified during routine follow-up. He was treated with concurrent chemoradiation therapy (5-FU and cisplantin). After evaluating the response, he underwent lymph node dissection in January 2020. Postoperative culture specimens were obtained. The patient has since been regularly followed up in the outpatient department.

**Tumor cell isolation and primary culture**

After resection, the tumors were kept in normal saline containing antifungal agents and antibiotics and moved to the laboratory. Normal tissues and fat were removed, and the tissues were rinsed with 1× Hank’s Balanced Salt Solution. The tumors were minced in a tube with a dissociation medium containing Dulbecco's Modified Eagle’s Medium/Nutrient Mixture F-12 with 20% fetal bovine serum (FBS) supplemented with 1 mg/mL collagenase type IV (Sigma, St. Louis, MO; Cat# C5138). The minced and suspended tumor cells were filtered through sterile nylon cell strainers with 70-µ pores (BD Falcon, Franklin Lakes, NJ, USA), rinsed with 50 mL of 1× Hank’s Balanced Salt Solution, and centrifuged at 220 ×*g* for 5 min. The cells were resuspended in Rosewell Park Memorial Institute (RPMI)-1640 medium (Hyclone, South Logan, UT, USA) with 20% FBS (Hyclone) and 2% penicillin/streptomycin solution (Gibco, Grand Island, NY, USA). Cell viability was determined using the trypan blue dye exclusion method.

**Statistical analysis of gene expression level**

The relative gene abundances were measured by read counts using StringTie. Statistical analyses were performed to identify DEGs using estimates of abundance for each gene in the samples. Genes with one or more Read Count values were excluded. To facilitate log2 transformation, one was added to each Read Count value of the filtered genes. The filtered data were log2-transformed and subjected to trimmed mean of M-values normalization. Statistical significance of the differential expression data was determined using exactTest, edgeR, and fold change, in which the null hypothesis was that no difference exists between groups. The false discovery rate was controlled by adjusting the p-value using the Benjamini-Hochberg algorithm. For the DEG sets, hierarchical clustering analysis was performed using complete linkage and Euclidean distance as similarity measures. Gene enrichment, functional annotation, and pathway analyses for significant genes were performed based on Gene Ontology and KEGG pathway analyses.

**Subcellular fractionation and immunoblot analysis**

Primary antibodies against GPC3 (1:500, Cat#174851, Abcam, Cambridge, UK), HSP70 (1:500, Cat#2787, Abcam), TP (1:500, Cat#226917, Abcam), SERCA1 (1:200, Cat#133275, Abcam), SERCA2 (1:400, Cat#137020, Abcam), SERCA3 (1:200, Cat#154259, Abcam), Bcl-2 (1:400, Cat#196495, Abcam), pCaMK2α (1:500, Cat#171095, Abcam), CaMK2α (1:500, Cat#92332, Abcam), pIKKα (1:500, Cat#138426, Abcam), CHOP (1:500, Cat#7351, Santa Cruz Biotechnology, CA, USA), pNFκB (1:500, Cat#86299, Abcam), Histone H3 (1:500, Cat#18521, Abcam), caspase-3 (1:500, Cat#9661, Cell Signaling Technology, Beverly, MA,USA) and β-actin (1:500, Cat#47778) were used. Equal amounts of protein were separated on an 8–10% sodium dodecyl sulfate-polyacrylamide gel, and the resolved proteins were electrotransferred onto polyvinylidene fluoride membranes (Millipore, Bedford, MA, USA). The membranes were subsequently blocked with 5–10% nonfat milk in TBST for 1 h at room temperature or overnight at 4 °C and incubated with appropriate concentrations of primary antibodies overnight at 4 °C. The membranes were then rinsed 3–10 times with TBST and probed with the corresponding secondary antibodies conjugated to horseradish peroxidase (Santa Cruz Biotechnology) at room temperature for 1 h. After rinsing, the blots were developed with ECL reagents (Pierce) and exposed to Kodak X-OMAT AR Film (Eastman Kodak, Rochester, NY, USA) for 1–5 min. Nuclear fractions were prepared using NE-PER Nuclear and Cytoplasmic Extraction reagents (Thermo Fisher Scientific; #78833) in accordance with the manufacturer's instructions. Separated nuclear and cytoplasmic extracts were isolated using a protein extraction solution (PRO-PREP, iNtRON Biotechnology, Seoul, Korea, #17081) or a histone extraction kit (Abcam, Cambridge, UK, #113476). Protein extracts and bands were quantified using NanoDrop 2000 (Thermo Fisher Scientific, Waltham, MA, USA) and the ImageJ software (NIH, Bethesda, MD, USA).

**Electrophoretic mobility shift assay (EMSA)**

The DNA binding activity of NFκB against the SERCA1 promoters was confirmed using a 32P-labeled oligonucleotide. Specific labeled and unlabeled oligonucleotides are as follows. Nuclear extracts were prepared and isolated using NE-PER Nuclear and Cytoplasmic Extraction Reagents (Pierce, Rockford, IL, USA; 78833) and protein extraction solution (PRO-PREP, iNtRON Biotechnology, Seoul, Korea, 17081). The DNA binding activity of NFκB against the *SERCA1* promoter was confirmed using a 32P-labeled oligonucleotide. Labeled and unlabeled oligonucleotides specific for NFκB (Forward 5′-GGGGGGTTCCC-3′, Reverse 5′-GGGAACCCCCC-3′) and mutant NFκB (Forward 5′-GGGcGcTTCCC-3′, Reverse 5′-GGGAAgCgCCC-3′) were synthesized by Bioneer. Nuclear extracts-DNA interactions were carried out in a 30-μL reaction mixture containing 5 μg of nuclear protein extract, 50 mM HEPES (pH 7.8), 300 mM KCl, 1% Igepal, 30% glycerol, 1 mM DTT, 0.02 μg of poly (dI-dC), 0.1 μg of ssDNA, and 20 000 CPM of 32P-radiolabeled oligonucleotide. For the supershift assay, 3 μg of anti-NFκB pNFκB (#86299, Abcam, Cambridge, UK) were added to the mixture of nuclear extracts-DNA and incubated for one additional hour at 4 °C. Further protocol details are as described in our previous article [1].

**Dual Luciferase Reporter Assay**

Promoter activity was evaluated using the Dual-Luciferase Reporter Assay (Promega, Madison, WI, USA; E1960), according to the manufacturer's protocol. Regions of NFκB binding sites were amplified by PCR from human genomic DNA (NFκB primers: Forward 5′-GGGGGGTTCCC-3′, Reverse 5′-GGGAACCCCCC-3′). The PCR products were cloned into the pGL4.70 promoter Vector (Promega) using T4 DNA ligase (Thermo Scientific, Waltham, MA, USA; EL0011). All insertions were confirmed by sequencing. Further protocol details are as described in our previous article [1].

**Immunofluorescence analysis and confocal imaging**

The expression level of nuclear translocated pNFκB was analyzed by immunofluorescence staining. Cells cultured on glass-bottomed dishes (MatTek, Ashland, MA. USA) were fixed with 4% formaldehyde solution (R&D Systems, Abingdon, UK) for 10 min and permeabilized with 0.5% TritonX-100 in phosphate-buffered saline (PBS) for 10 min. The slides were air dried, washed with PBS, and incubated overnight at 4 °C with anti-pNFκB (1:50, Cat#86299, Abcam, Cambridge, UK) in 3% bovine serum albumin included PBS. After being washed with PBS, slides were incubated with Alexa 488 (1:200; Molecular Probes, Eugene, OR, USA) for 1-2 hours at room temperature. Nuclei were stained with Hoechst 33342 (Life Technologies) for visualization. Images were observed under a confocal microscope (LSM Meta 700; Zeiss, Oberkochen, Germany) and analyzed using the Zeiss LSM Image Browser, version 4.2.0121.

**Cytosolic free calcium measurements using microspectrofluorimetry**

Cytosolic free calcium levels in patient-derived HCC cells were imaged using a calcium-sensitive fluorescent dye, Fura-2AM. HCC cells were incubated with Fura-2AM in normal phosphate buffered saline solution for 30 min at 37 ℃, followed by de-esterification of the dye for another 30 min at 22–25 ℃. Fura-2AM was excited at a wavelength of 340 nm and the emitted light was filtered using a 380 nm band pass filter. The ratio of Fura-2 fluorescence intensities measured at excitation wavelengths of 340 and 380 nm [F340/F380] was used as the [Ca2+]i-related signal. Fluorescence intensities (∆F) were normalized to the resting values. Cells were perfused with 140 mM NaCl, 5.4 mM KCl, 2 mM CaCl2, 1 mM MgCl2, 33 mM glucose, and 20 mM HEPES (pH 7.4, adjusted with NaOH, and 320–350 osm with sucrose).

**Candidate 56 and 62 treatment alone did not interfere with normal cardiac function in normal mouse**

Whole experiments were within the guidelines established by the Animal Experi-ment Committee of Yonsei University. Cancer cells were not injected 6-week-old BALB/c nude mice was randomly grouped and administered with 25 mg/kg candidate 56 and 62 (p.o.) alone every two days for 29 days. Mouse whole body weight was measured after candidate 56 or 62 administration. Animals were maintained under specific pathogen-free conditions. All the experiments were approved by the Animal Experiment Committee of Yonsei University (IACUC approval No 2022-0105).

**In vivo mouse xenograft model with patient-derived HCC cells**

All the experiments were performed in accordance with the guidelines established by the Animal Experimentation Committee of Yonsei University. Patient-derived HCC cells (4.5 × 106 cells/mouse) were injected subcutaneously into the upper left flank region of female NOD/Shi-scid, IL-2Rγ KOJic mice. After 13 days, the tumor cell-planted mice were randomly grouped (n = 10 per group). Tumor size was measured using calipers, and tumor volume was estimated using the following formula: L × S2/2 (where L and S are the longest and shortest diameters, respectively). After 13 days, when the tumor sizes reached volumes of approximately 100–200 mm3, the tumor-bearing mice were randomly grouped and administered 40 mg/kg regorafenib (p.o.), 5 mg/kg cisplatin (p.o.), 80 mg/kg sorafenib (p.o.) alone or a combination of 20 mg/kg regorafenib (p.o.), 2.5 mg/kg cisplatin (p.o.), 40 mg/kg sorafenib (p.o.) with SERCA inhibitors 25 mg/kg (p.o.) (thapsigargin, candidate 56 or 62) once every other day. Different doses of candidate 56 or 62 were screened for dose selection. The doses of regorafenib, cisplatin and sorafenib was fixed every 20, 2.5 and 40mg/kg (Figure S4 A–C). The tumor volume was quantified every two days using calipers. Tumor volume was calculated using the following formula: L × S2/2 (L, longest diameter; S, shortest diameter). Animals were maintained under specific pathogen-free conditions. All experiments were approved by the Animal Experiment Committee of Yonsei University (IACUC approval No 2022-0105).

**References**

1. Park KC, Kim SW, Jeon JY, Jo AR, Choi HJ, Kim J, et al: Survival of Cancer Stem-Like Cells Under Metabolic Stress via CaMK2alpha-mediated Upregulation of Sarco/Endoplasmic Reticulum Calcium ATPase Expression. Clin Cancer Res. 2018;24(7):1677-90.

|  | **YUMC-NM-H1** | **YUMC-M-H1** | **YUMC-M-H2** | **YUMC-M-H3** | **YUMC-M-H4** | **YUMC-M-H5** | **YUMC-M-H6** | **YUMC-M-H7** | **YUMC-M-H8** | **YUMC-M-H9** | **YUMC-M-H10** | **YUMC-M-H11** | **YUMC-M-H12** | **YUMC-M-H13** |
| --- | --- | --- | --- | --- | --- | --- | --- | --- | --- | --- | --- | --- | --- | --- |
| **Age at Diagnosis** | 71 | 66 | 67 | 67 | 66 | 51 | 53 | 47 | 61 | 63 | 49 | 65 | 53 | 71 |
| **Gender** | Female | Male | Male | Male | Male | Male | Female | Female | Male | Male | Male | Male | Female | Male |
| **Primary**  **Disease Site** | Liver | Liver | Liver | Liver | Liver | Liver | Liver | Liver | Liver | Liver | Liver | Liver | Liver | Liver |
| **Primary**  **Pathology** | Hepatocellular carcinoma | Hepatocellular carcinoma (metastasis) | Hepatocellular carcinoma (Recurrence after 5FU treatment) | Hepatocellular carcinoma (Recurrence & Metastasis after nexavar treatment) | Hepatocellular carcinoma (Recurrence & Metastasis after FOLFOX treatment) | Hepatocellular carcinoma (Recurrence & Metastasis after FOLFOX treatment) | Hepatocellular carcinoma (metastasis) | Hepatocellular carcinoma (metastasis) | Hepatocellular carcinoma (Recurrence & Metastasis after FOLFOX treatment) | Hepatocellular carcinoma (metastasis | Hepatocellular carcinoma (Recurrence & Metastasis after FOLFOX treatment | Hepatocellular carcinoma (Recurrence & Metastasis after cisplatin treatment) | Hepatocellular carcinoma (Recurrence & Metastasis after nexavar treatment) | Hepatocellular carcinoma (Metastasis after nexavar treatment |
| **Classification of specimen used for culture** | Fresh tumor | Fresh tumor | Fresh tumor | Fresh tumor | Fresh tumor | Fresh tumor | Fresh tumor | Fresh tumor | Fresh tumor | Fresh tumor | Fresh tumor | Fresh tumor | Fresh tumor | Fresh tumor |
| **Obtained from** | Severance Hospital, Seoul, Korea | Severance Hospital, Seoul, Korea | Severance Hospital, Seoul, Korea | Severance Hospital, Seoul, Korea | Severance Hospital, Seoul, Korea | Severance Hospital, Seoul, Korea | Severance Hospital, Seoul, Korea | Severance Hospital, Seoul, Korea | Severance Hospital, Seoul, Korea | Severance Hospital, Seoul, Korea | Severance Hospital, Seoul, Korea | Severance Hospital, Seoul, Korea | Severance Hospital, Seoul, Korea | Severance Hospital, Seoul, Korea |

**Supplementary Table 1.** Properties and clinical features of 14 patients. Patient-derived Hepatocellular carcinoma cells were isolated from these patient specimen.


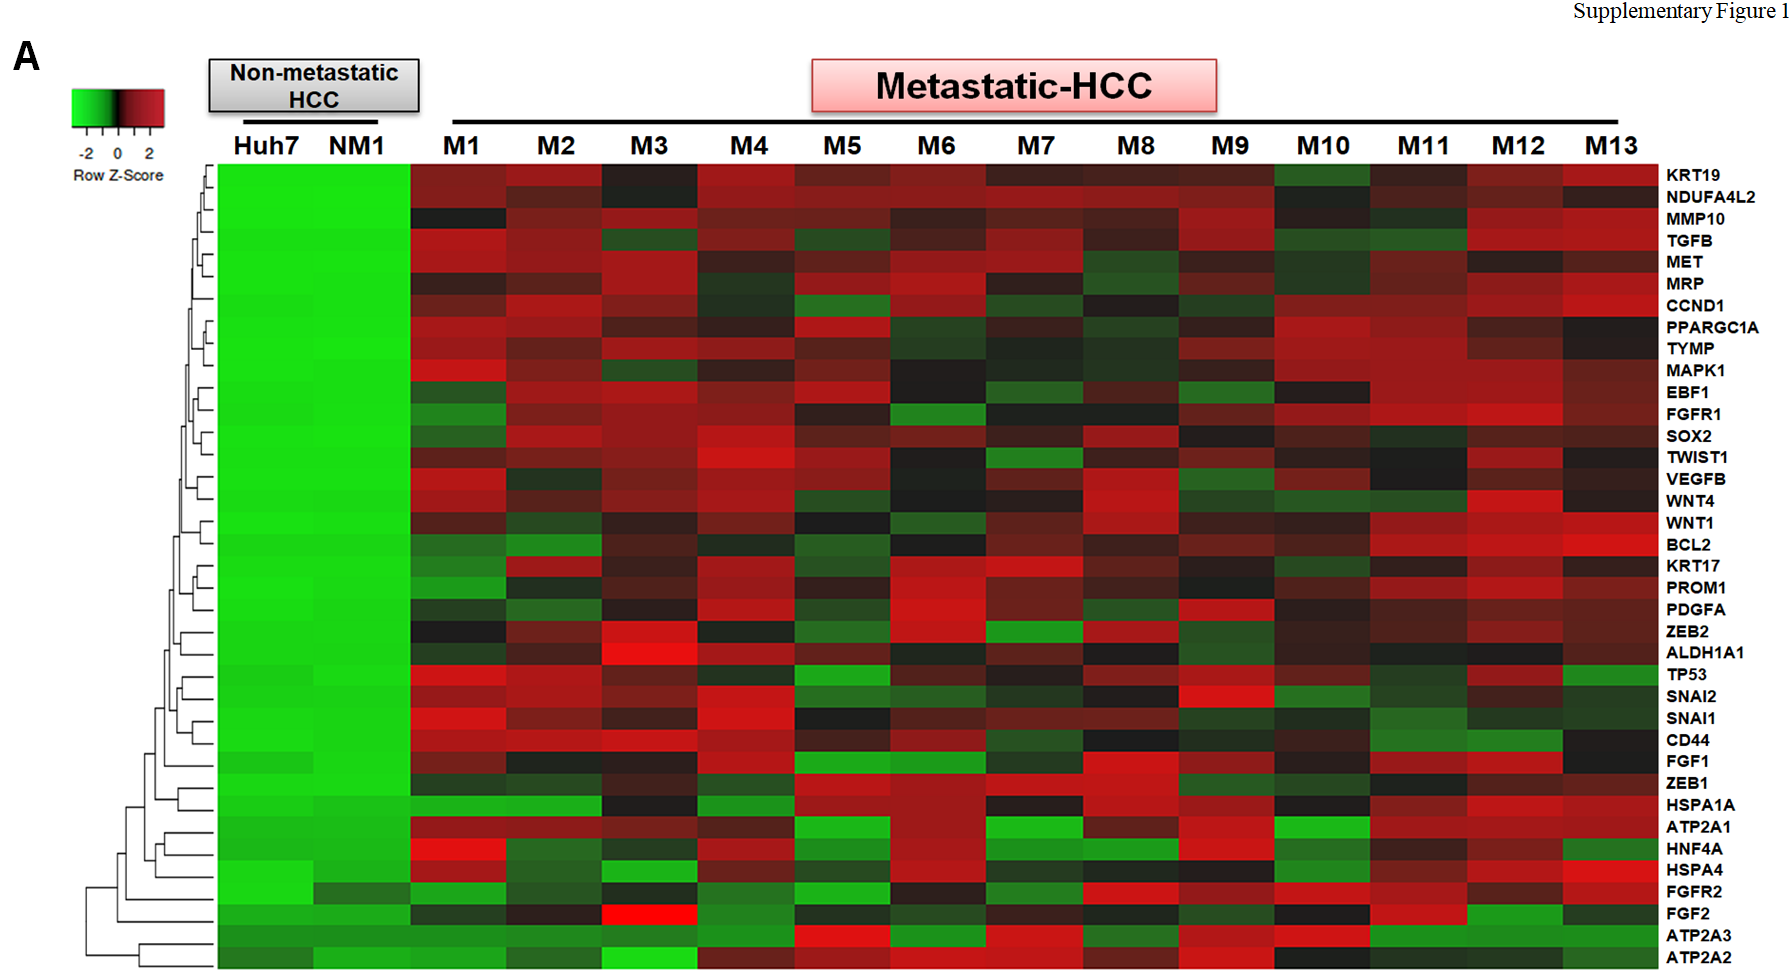


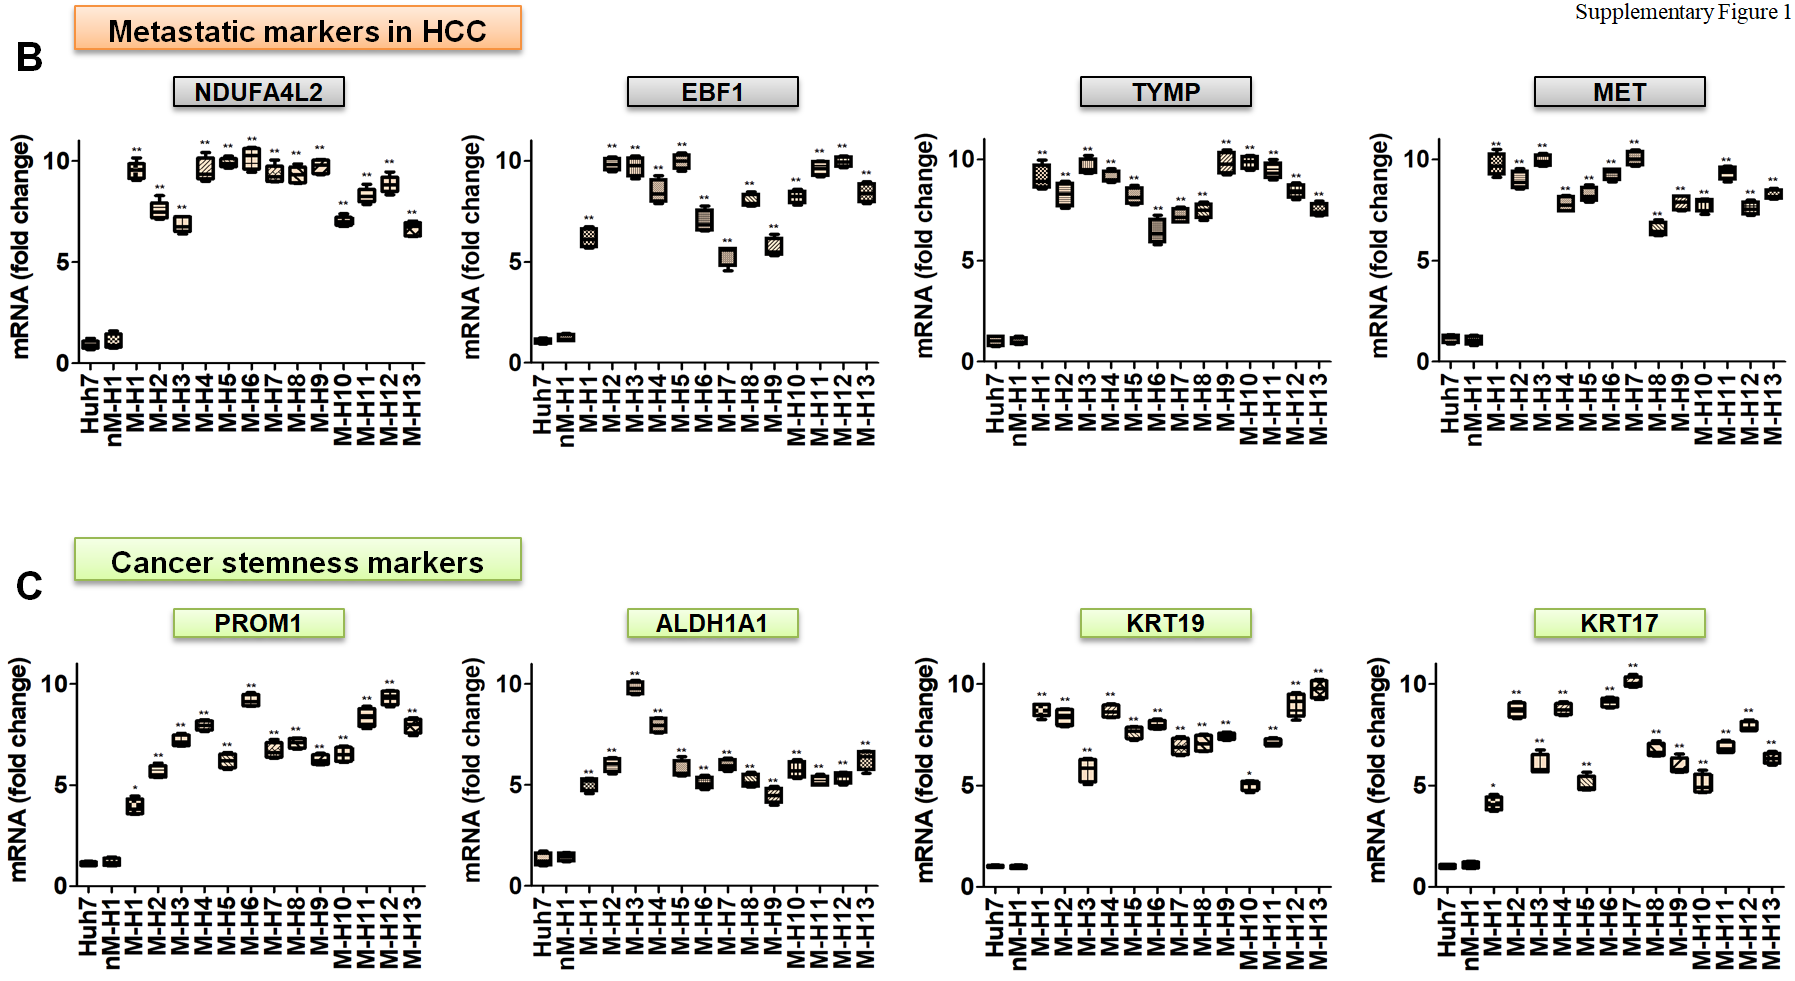


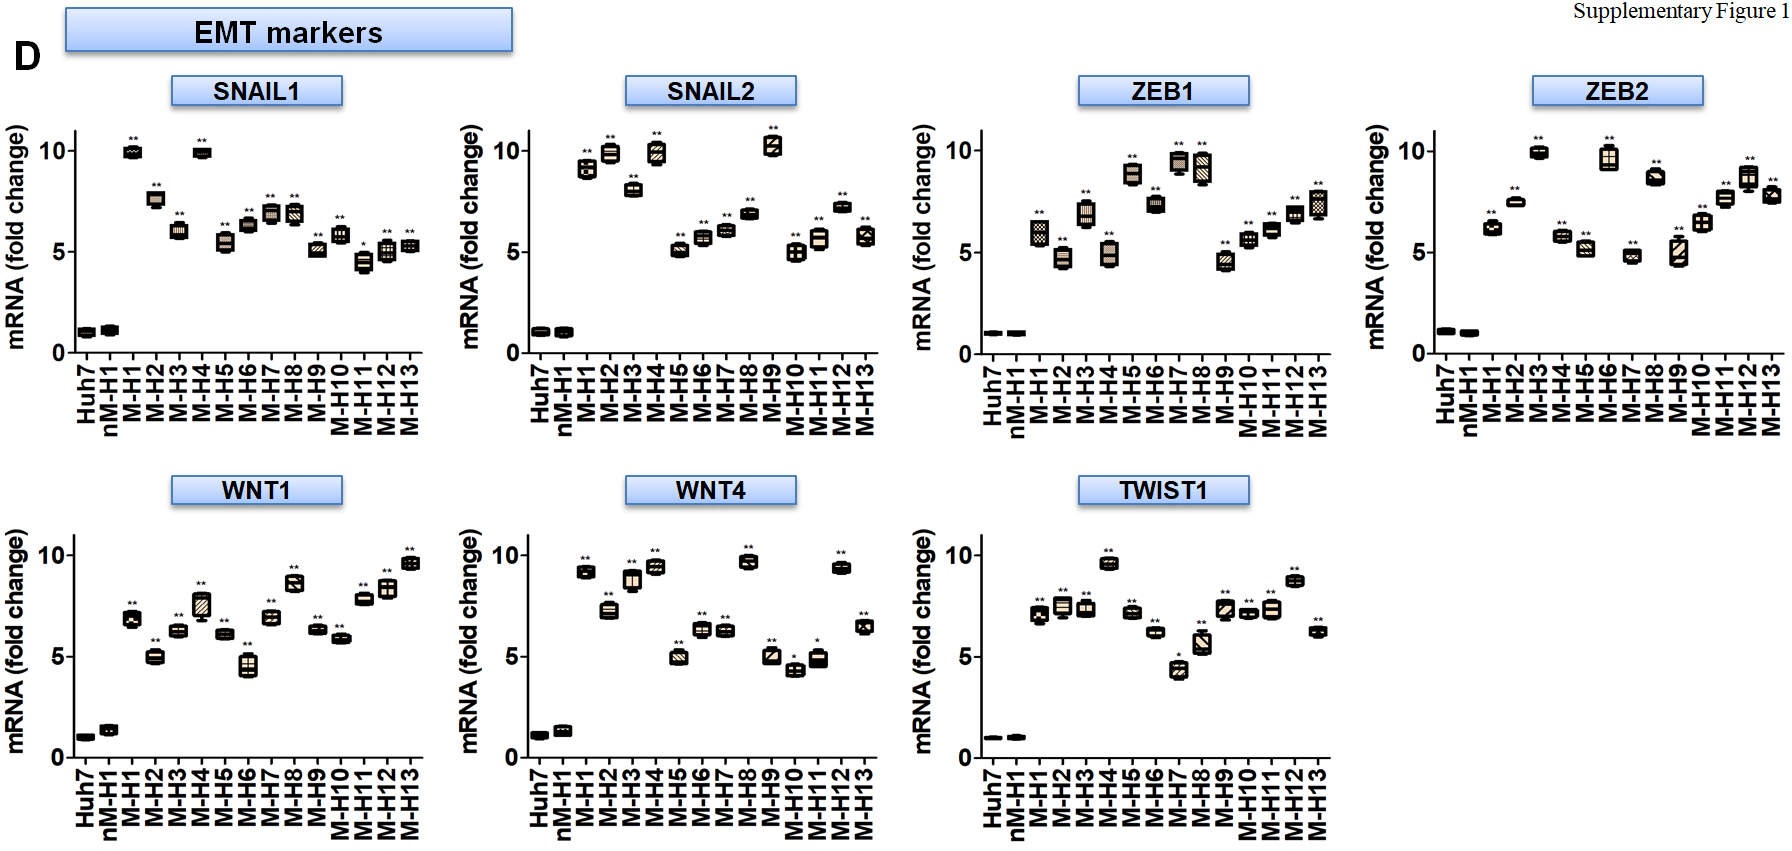


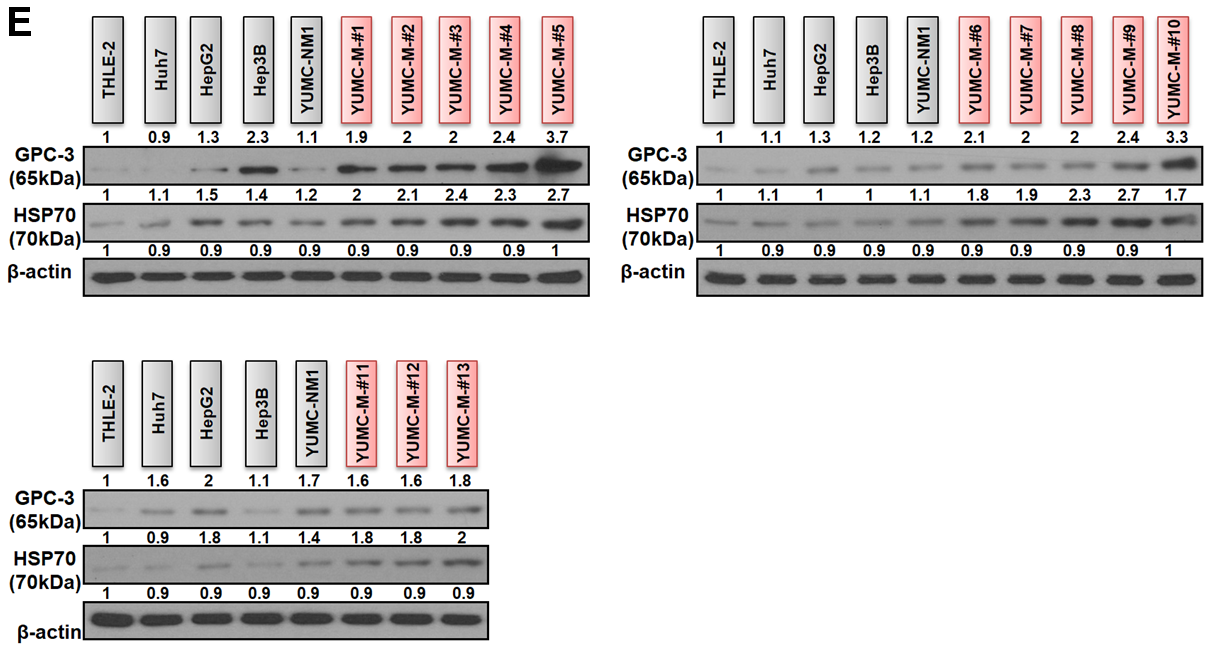


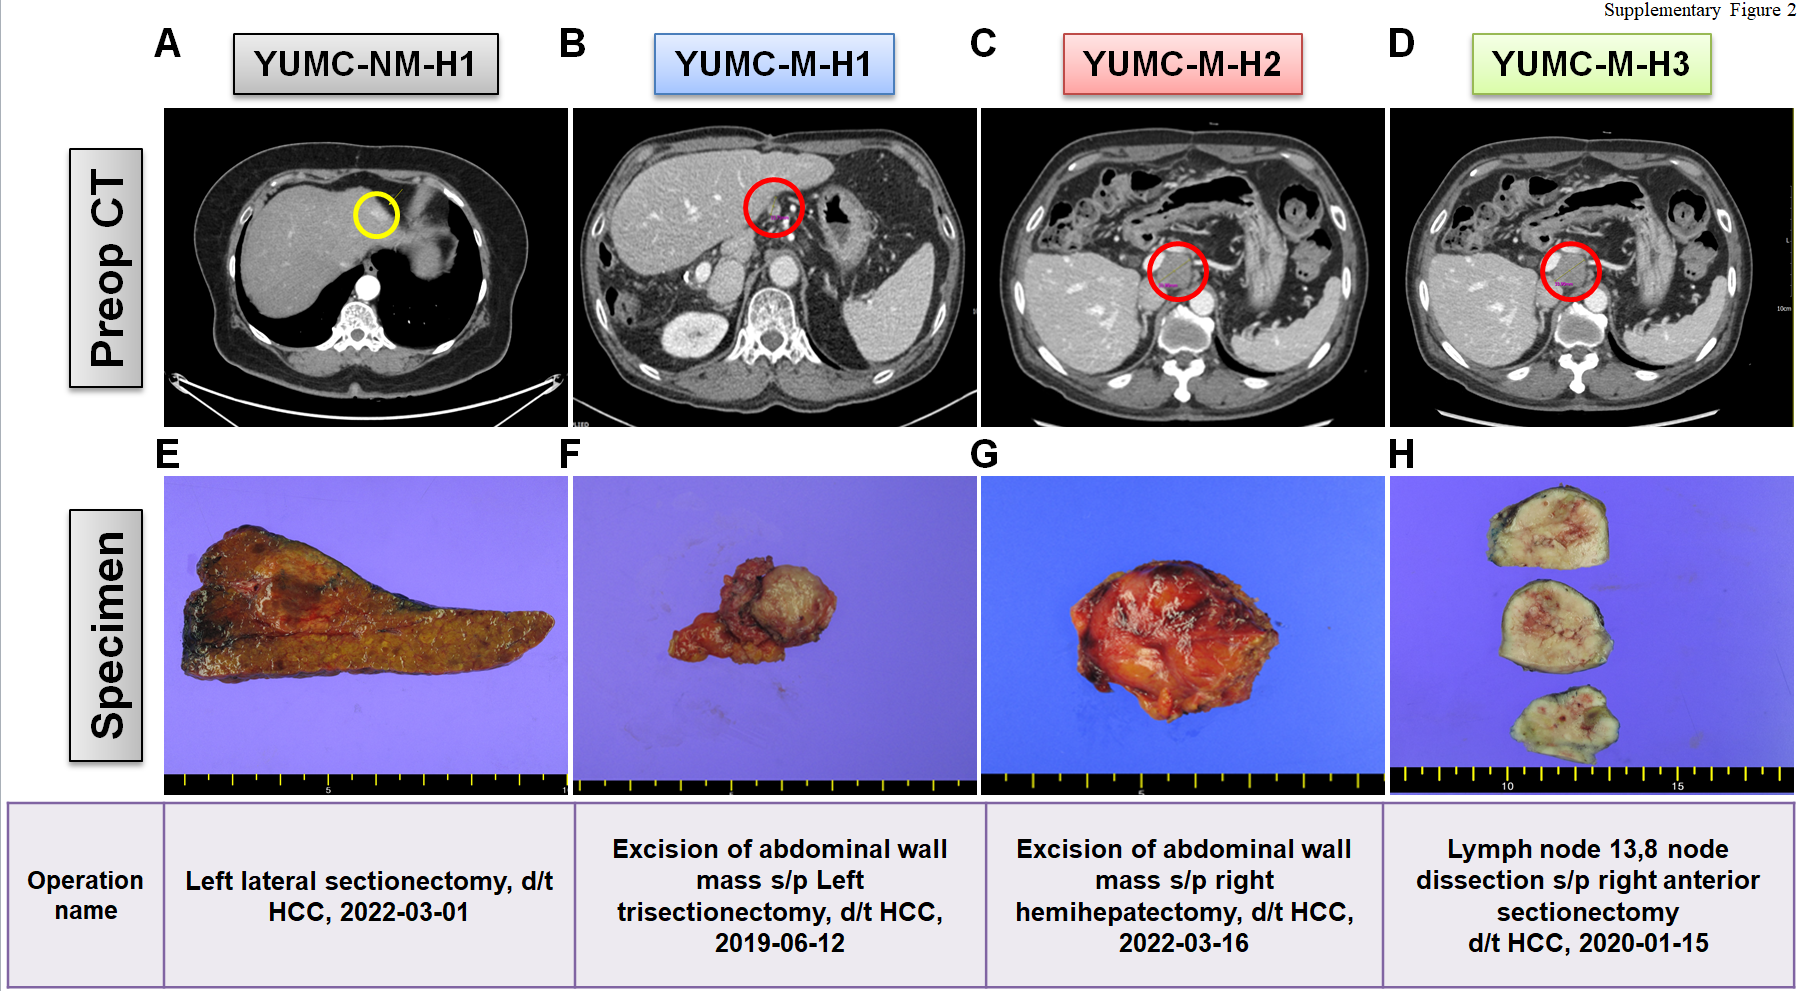


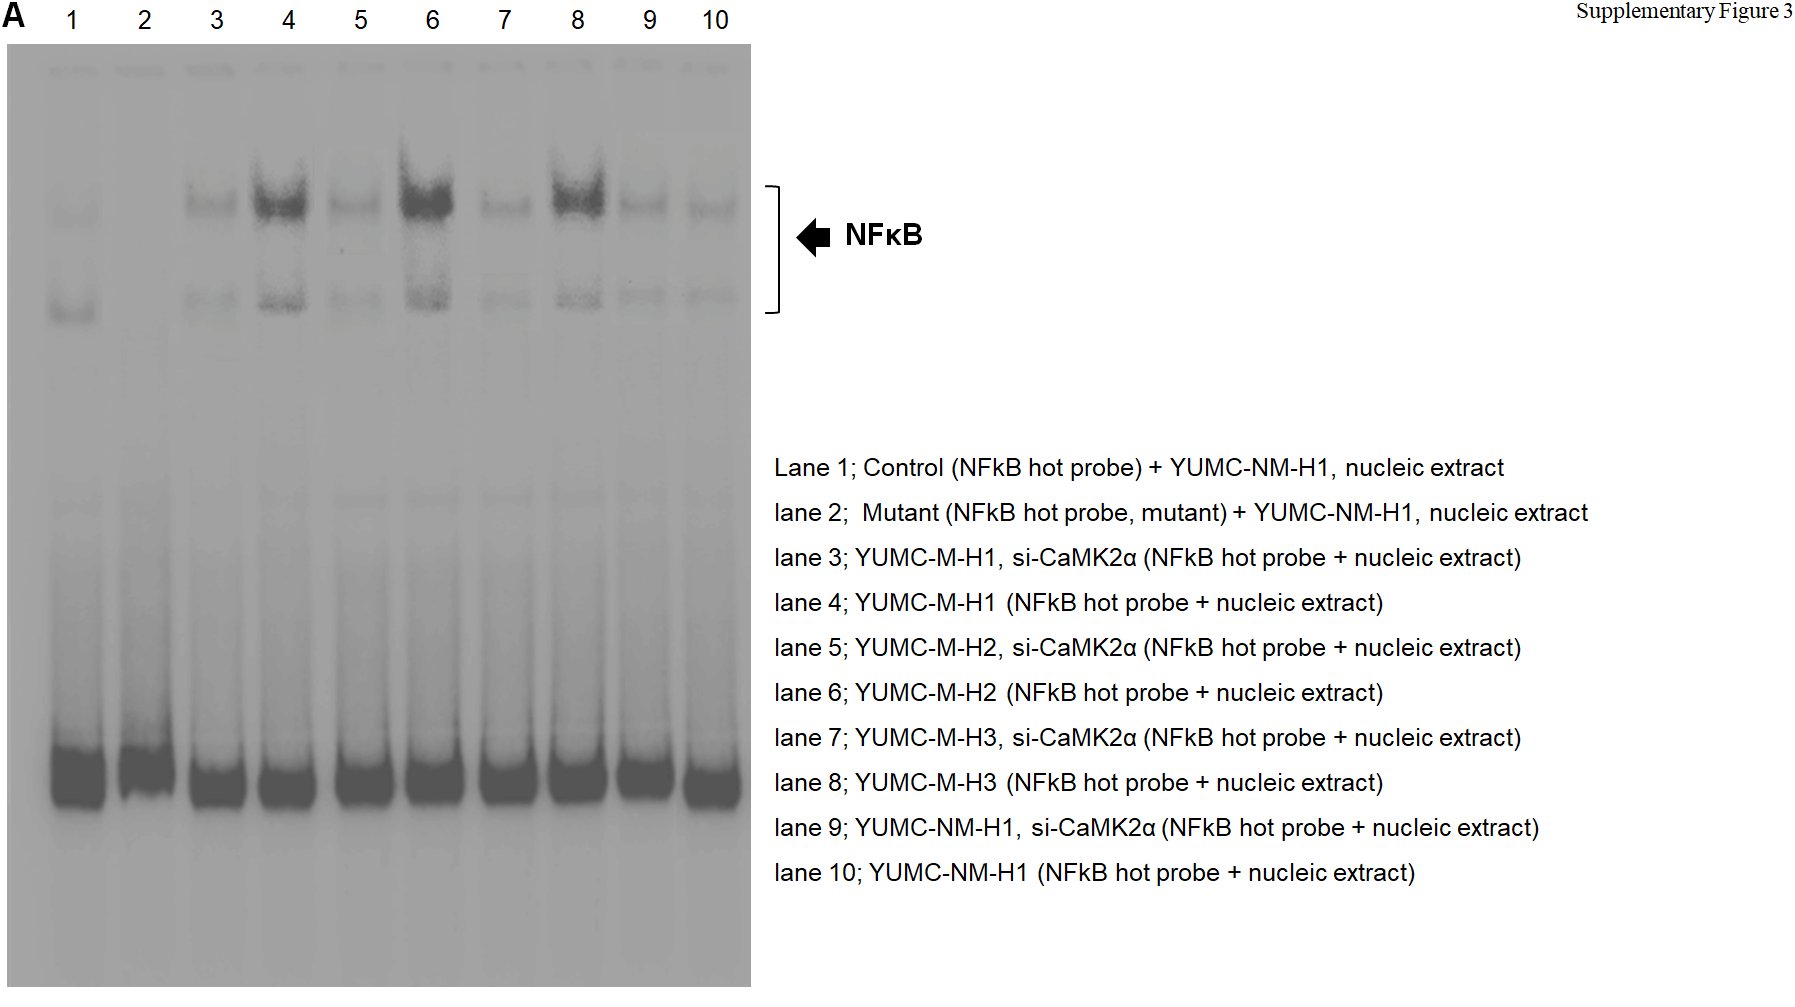


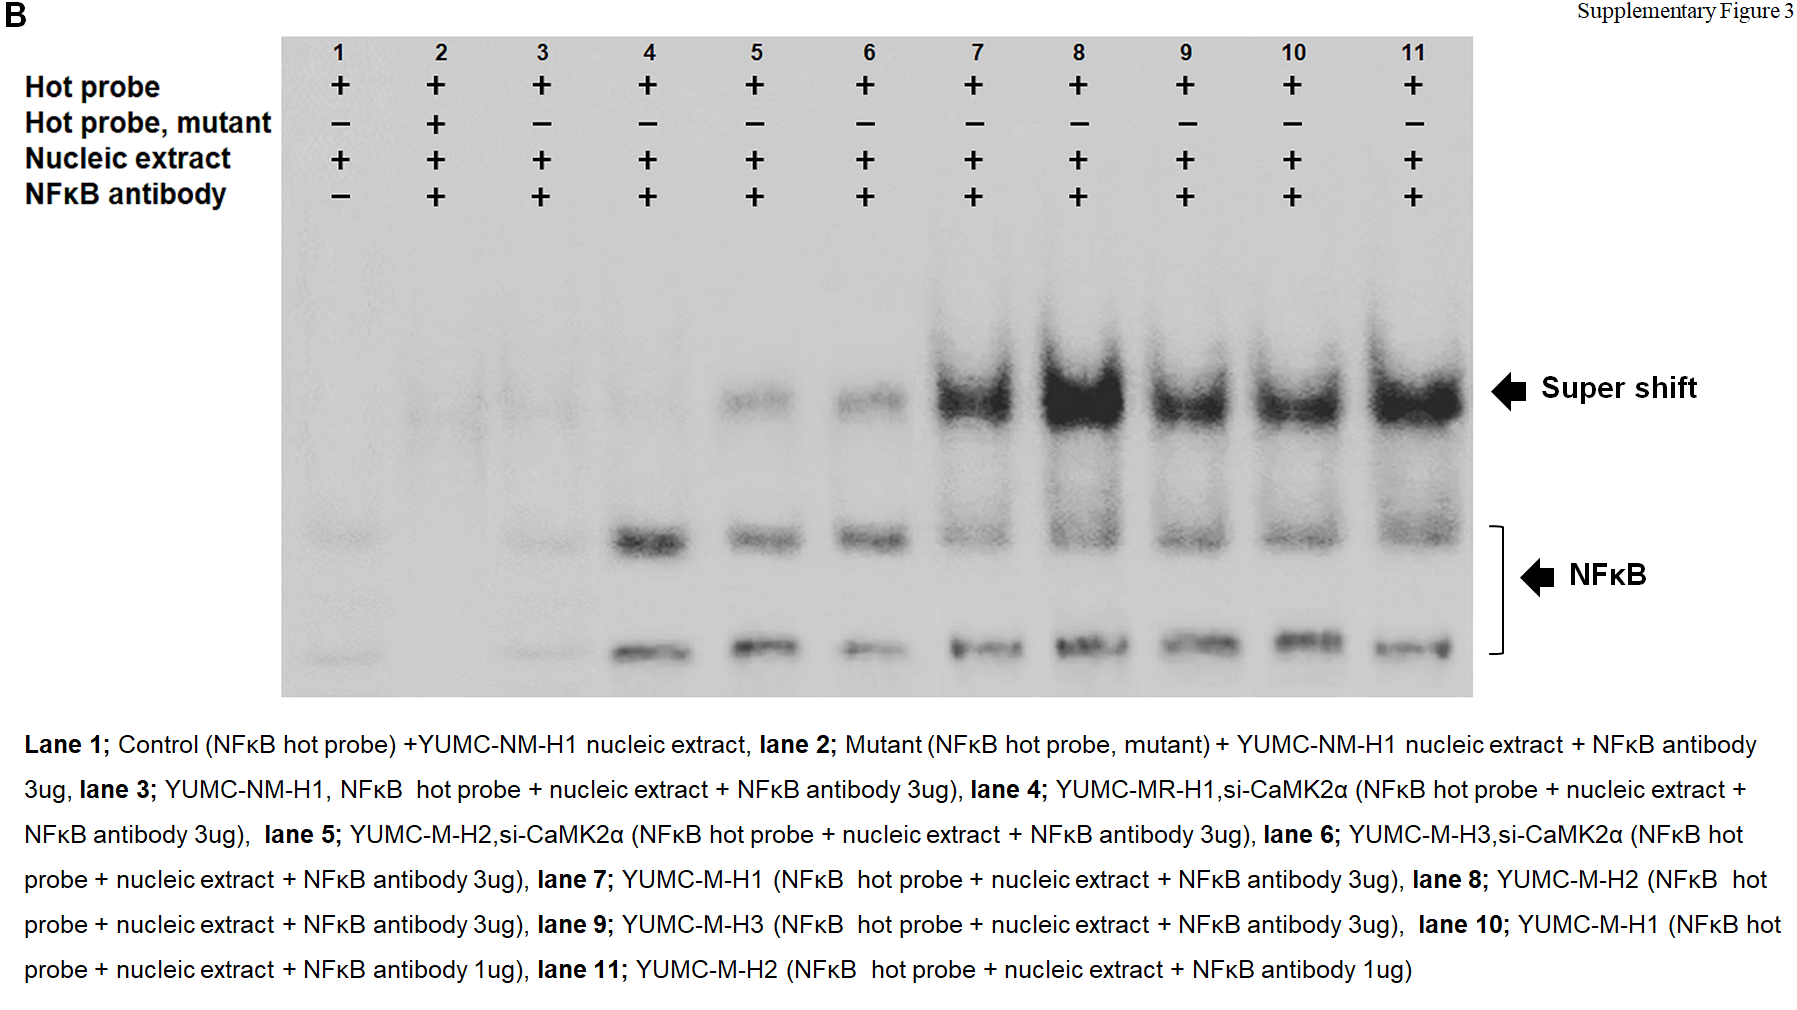


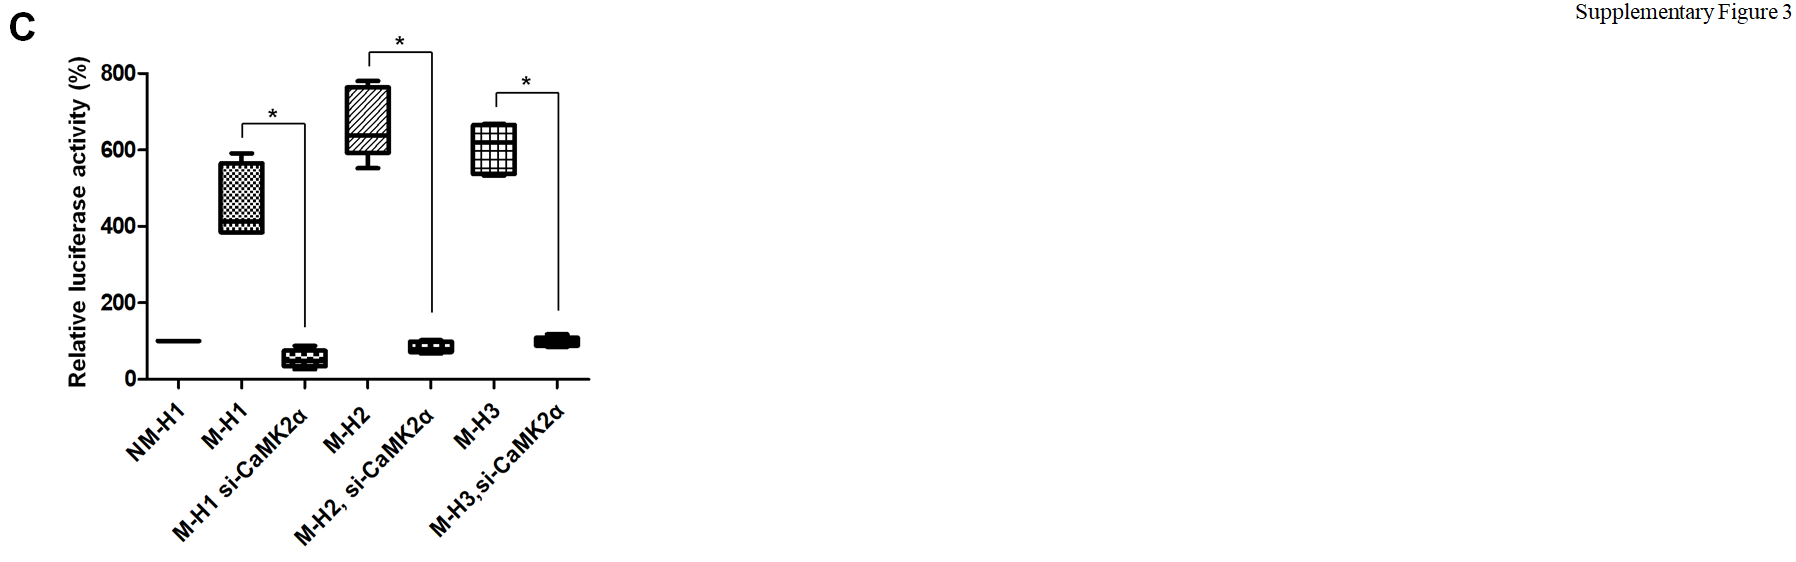


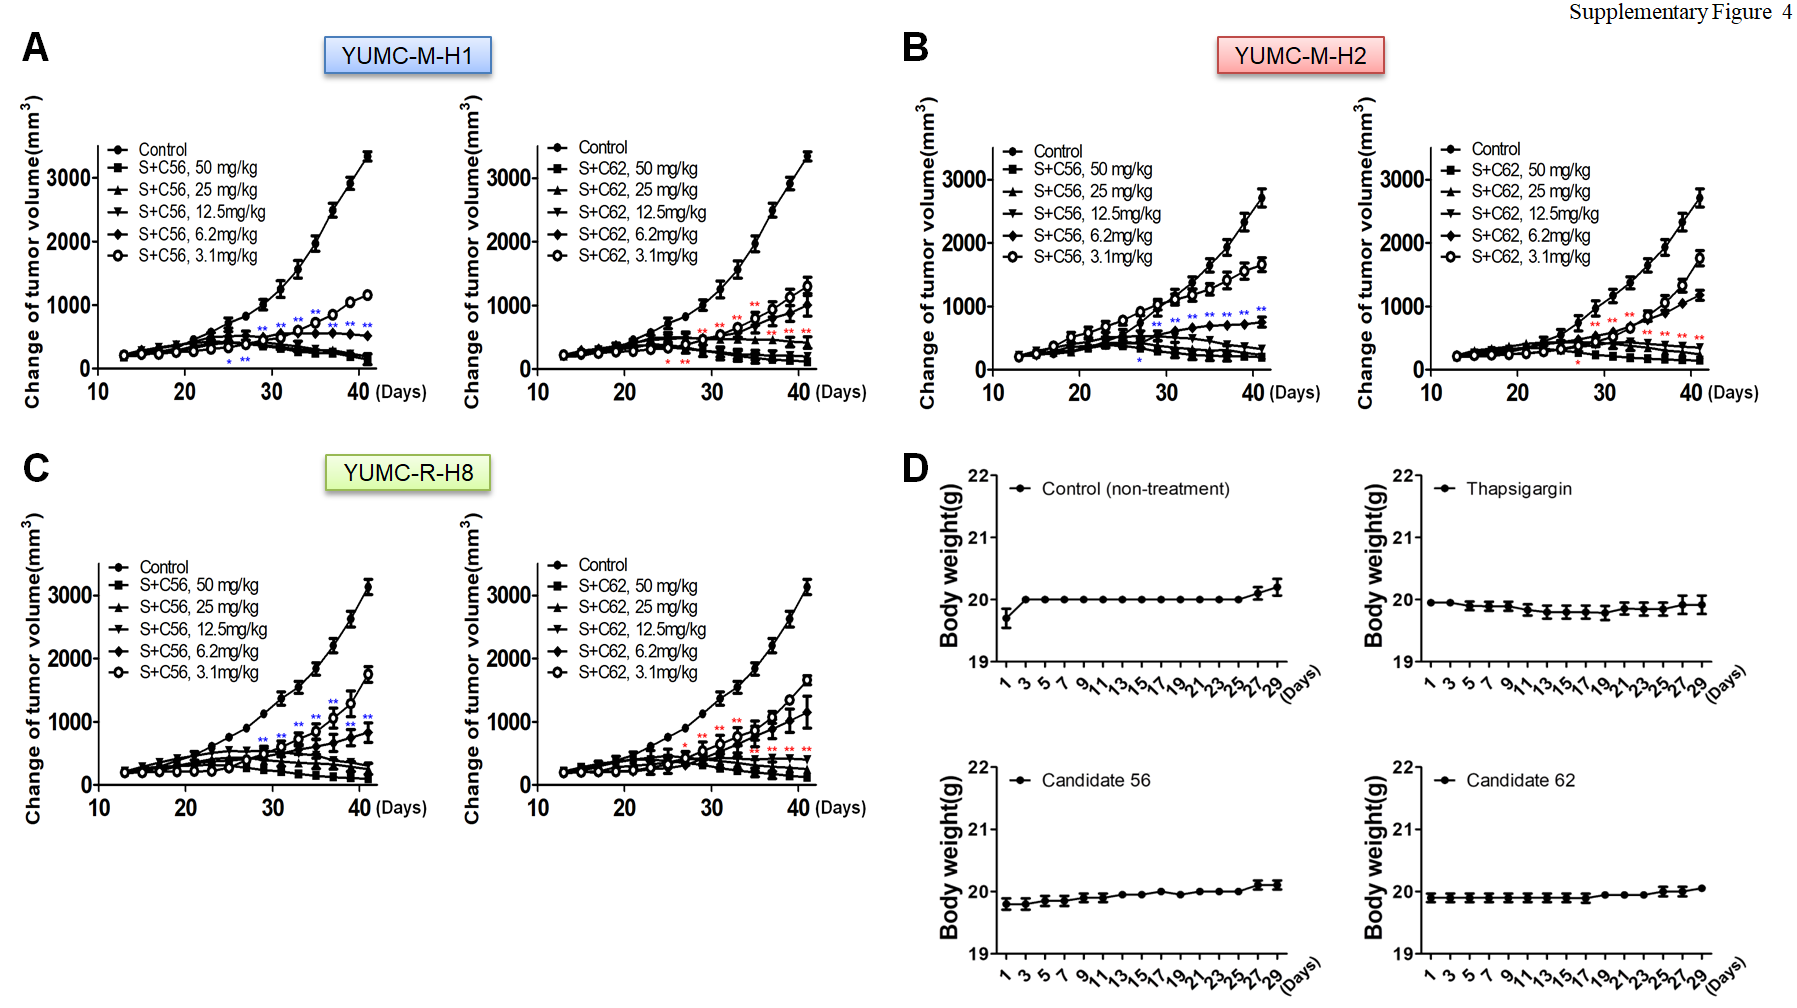

Supplement: Supplementary file 1 [file ec3dba2049d0fb758a7b3ac8.docx]
